# Supplementary material
Source: MDPI journal article supplement (https://www.mdpi.com/2220-9964/9/6/396)

# LAND PRICE - OSTRAVA

absolute land price (2019), land price change (2006 - 2019)

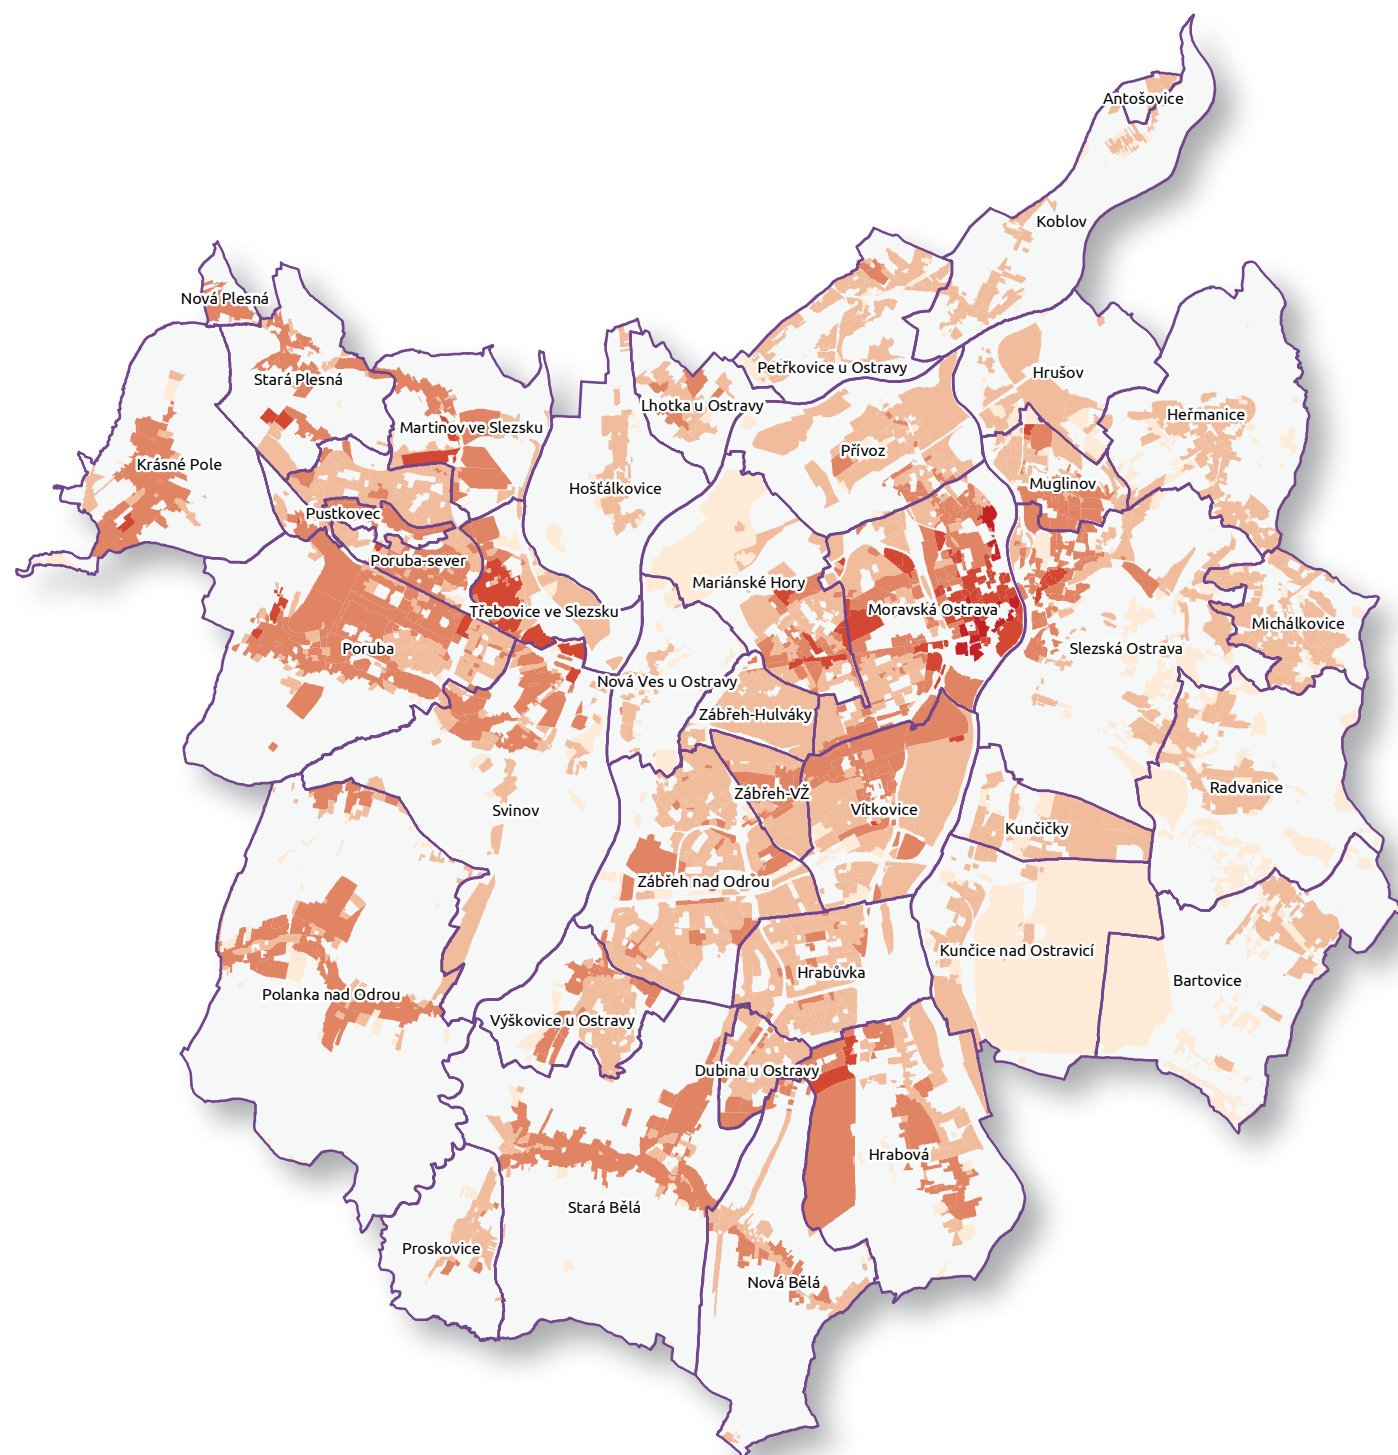

0 500 1 000 2 000 5 000 > 5 000 (CZK)

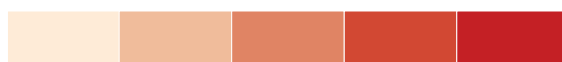

absolute land price

— cadastral unit  
▨ not valued

0 5 km

less -25 0 50 100 200 more (%)

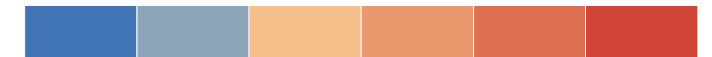

land price change

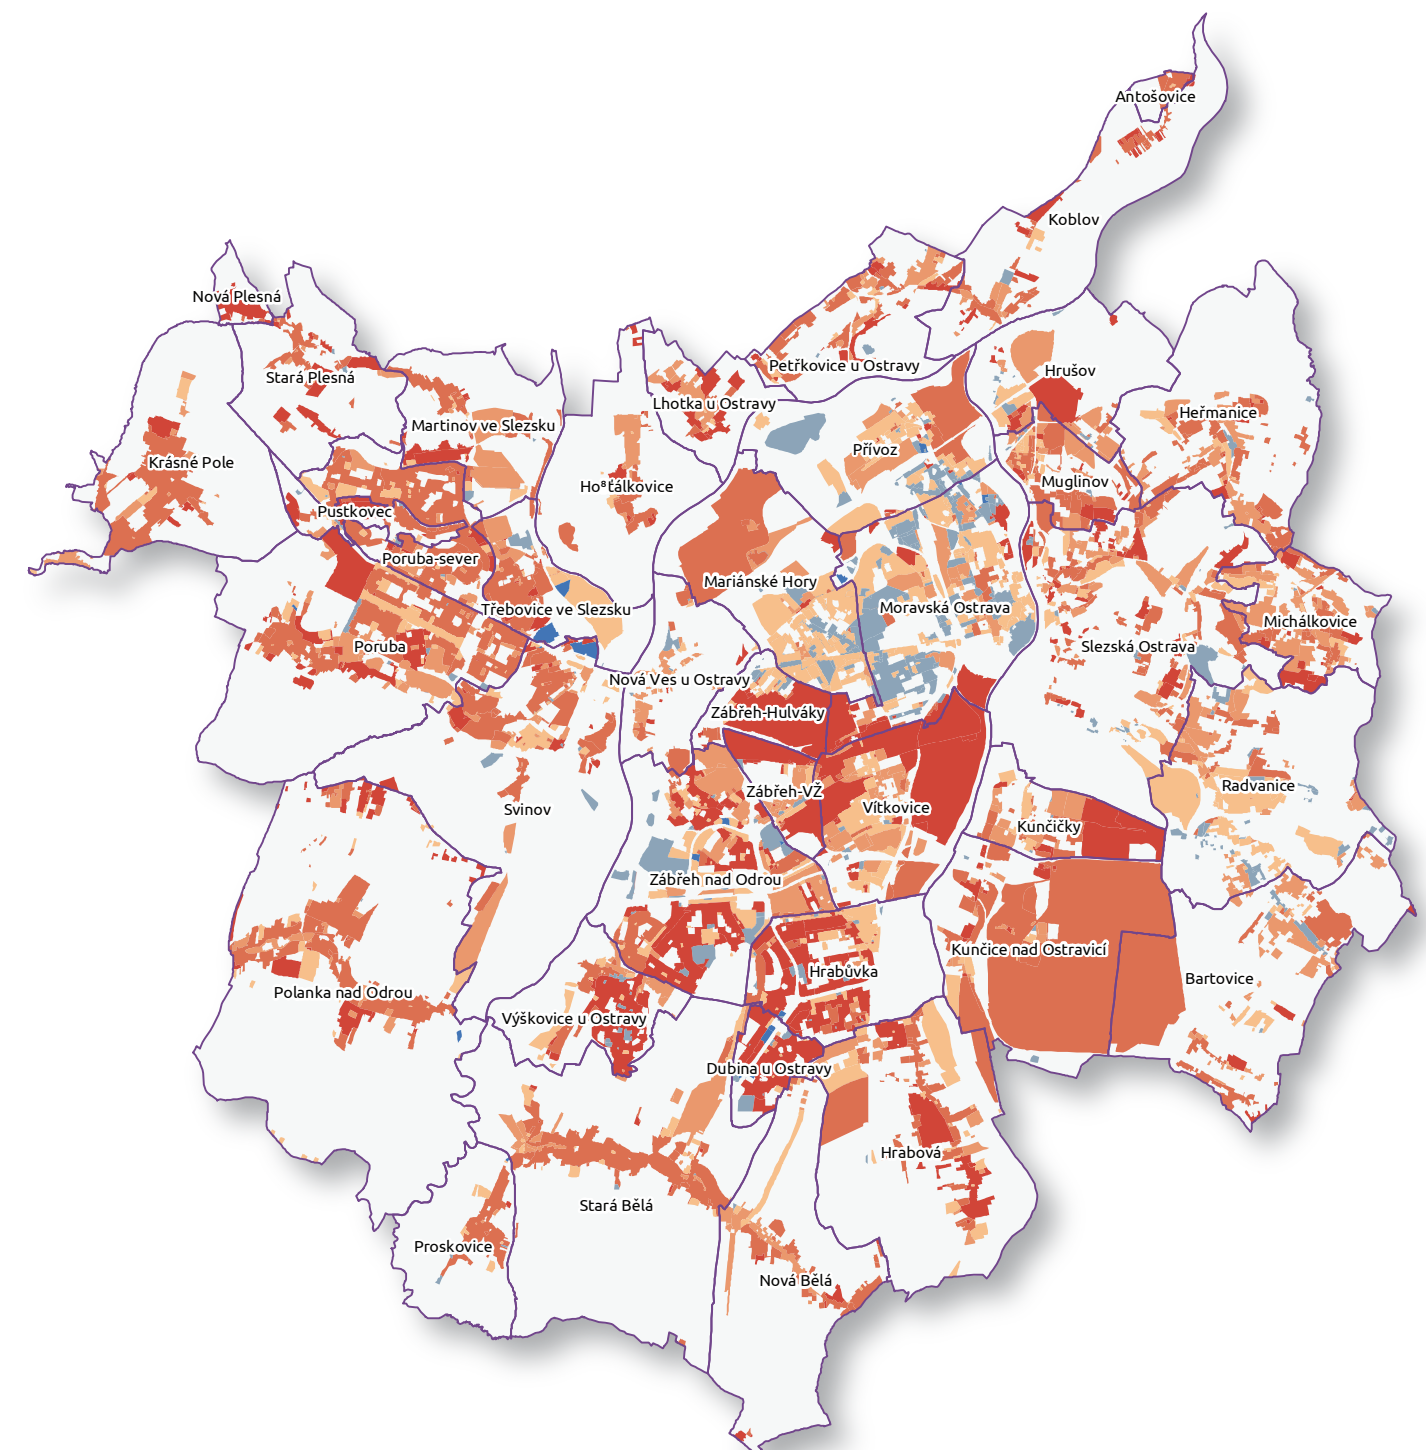

Supplement: s1 [file s1]
