# Supplementary material
Source: MDPI journal article supplement (https://www.mdpi.com/2220-9964/9/6/396)

# LAND PRICE - ZLÍN

absolute land price (2019), land price change (2006 - 2019)

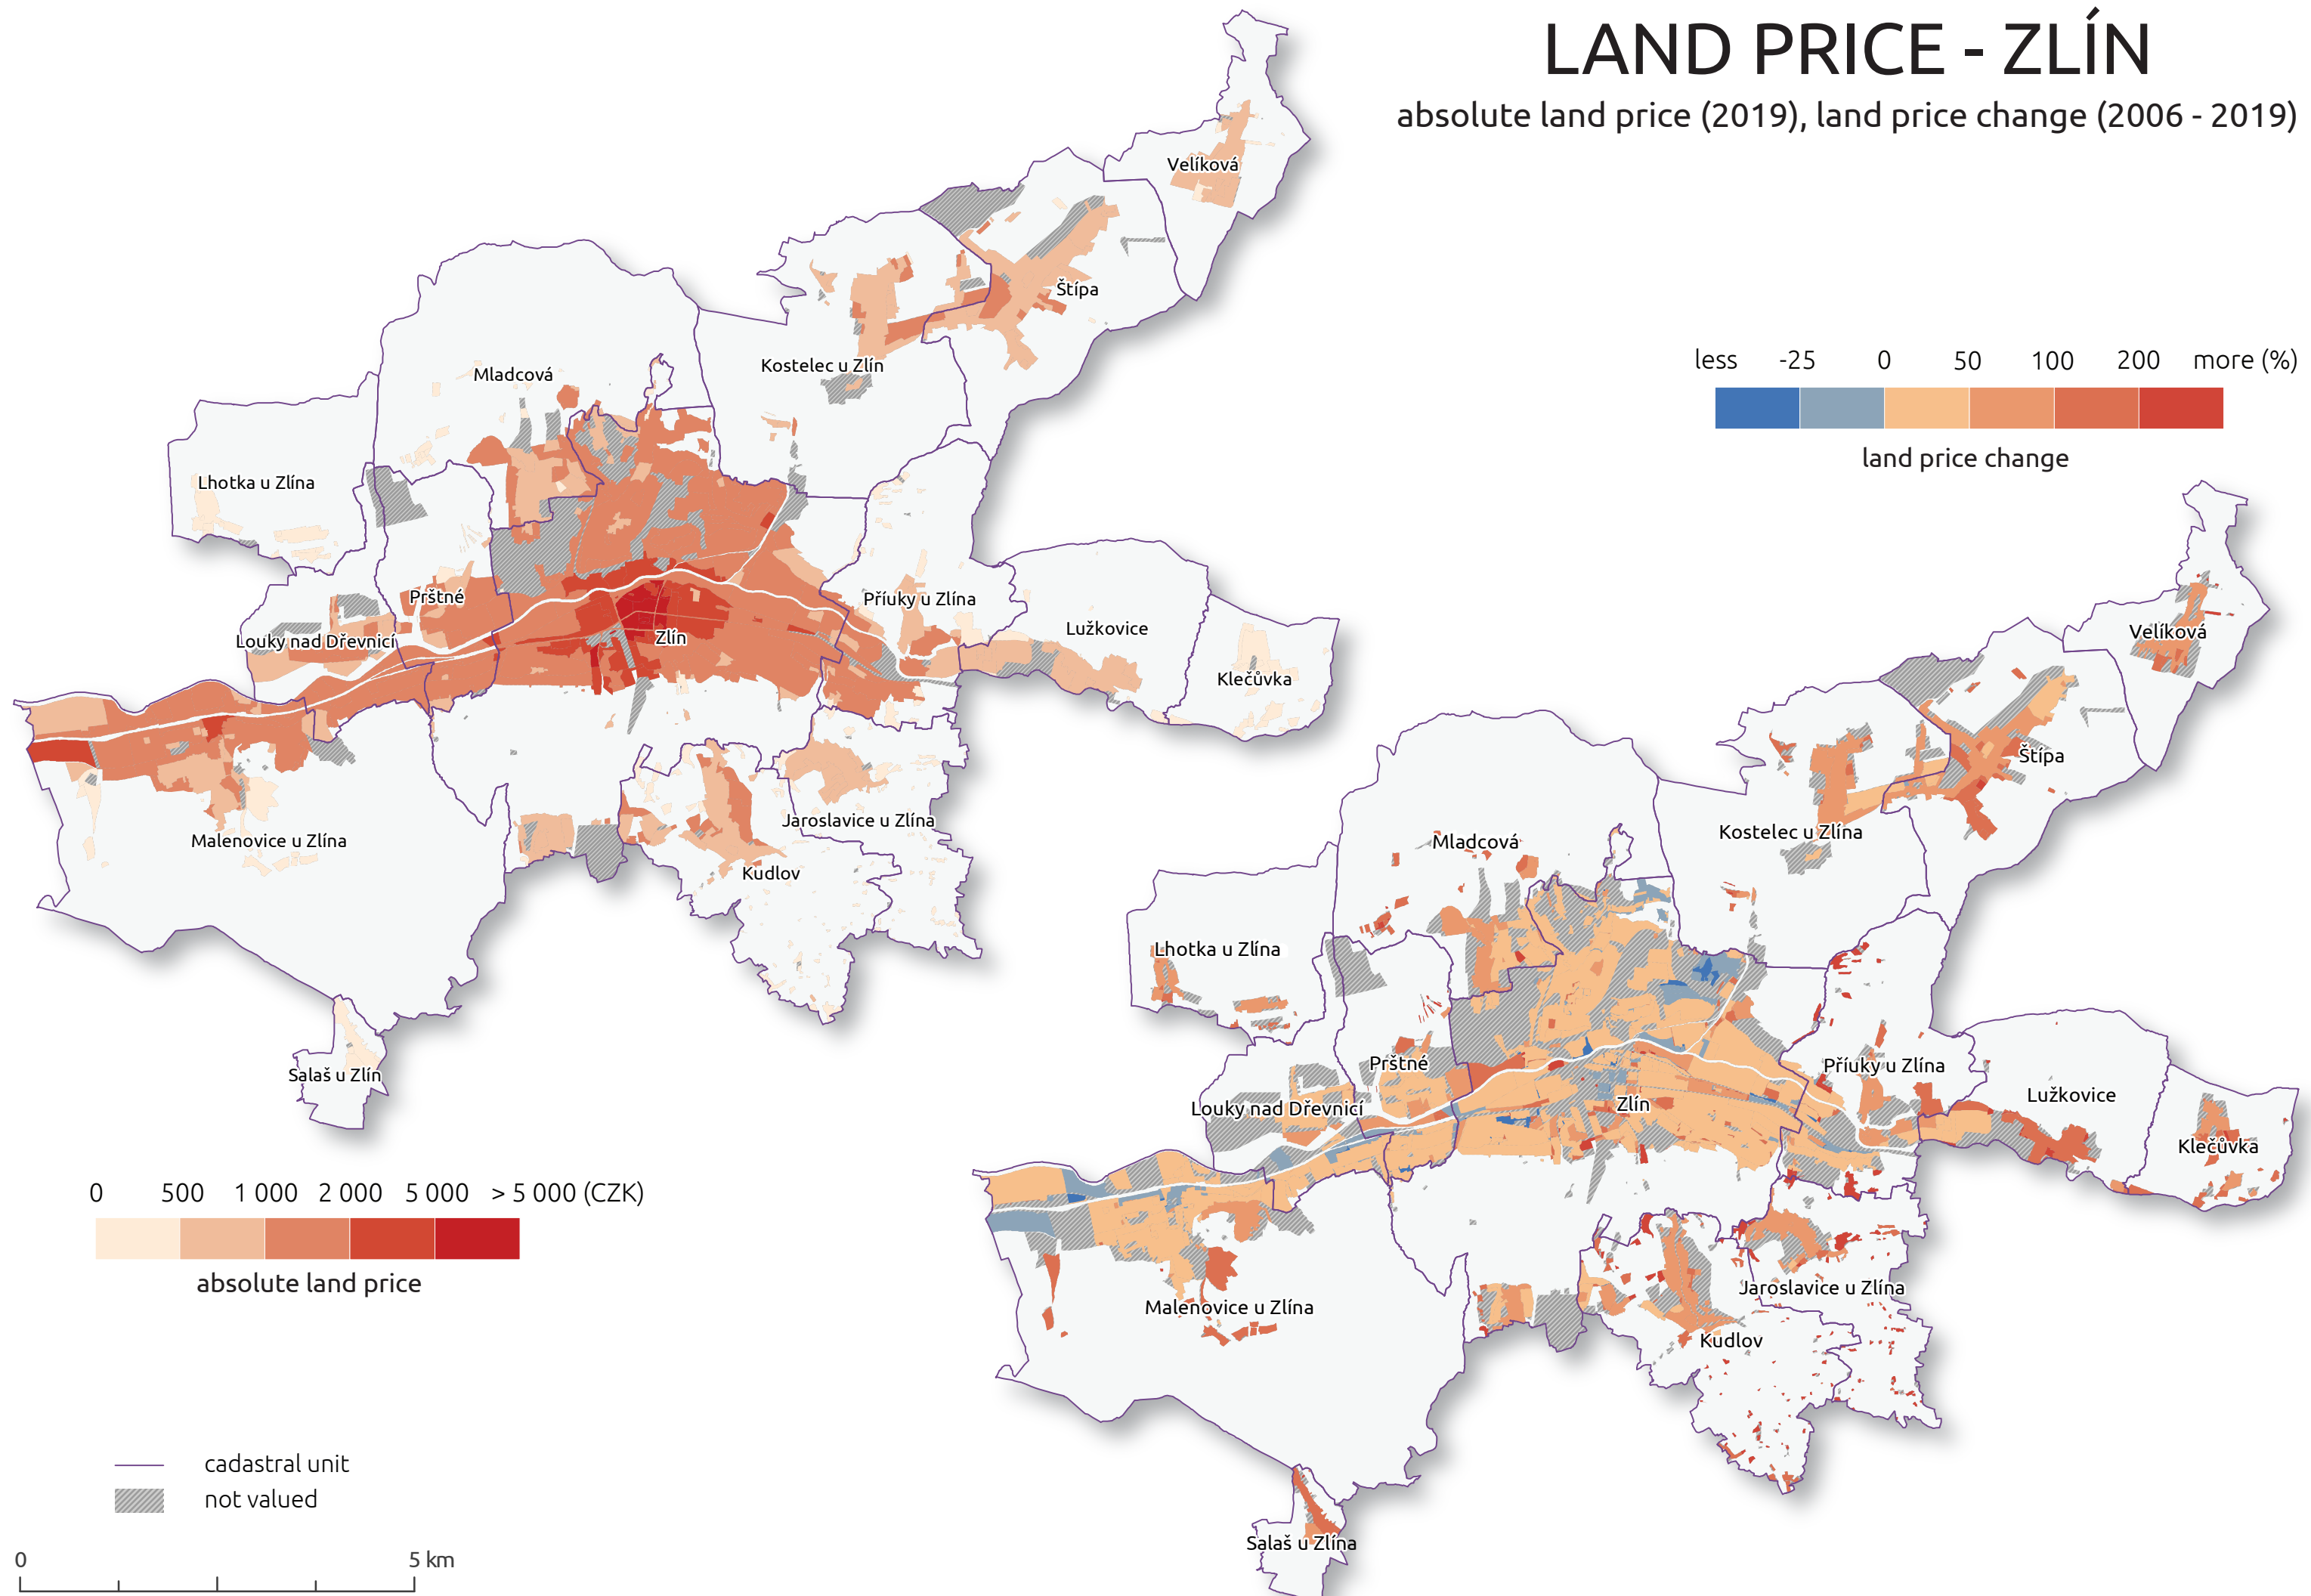

Supplement: s1 [file s1]

# LAND PRICE - PRAQUE

absolute land price (2019), land price change (2006 - 2019)

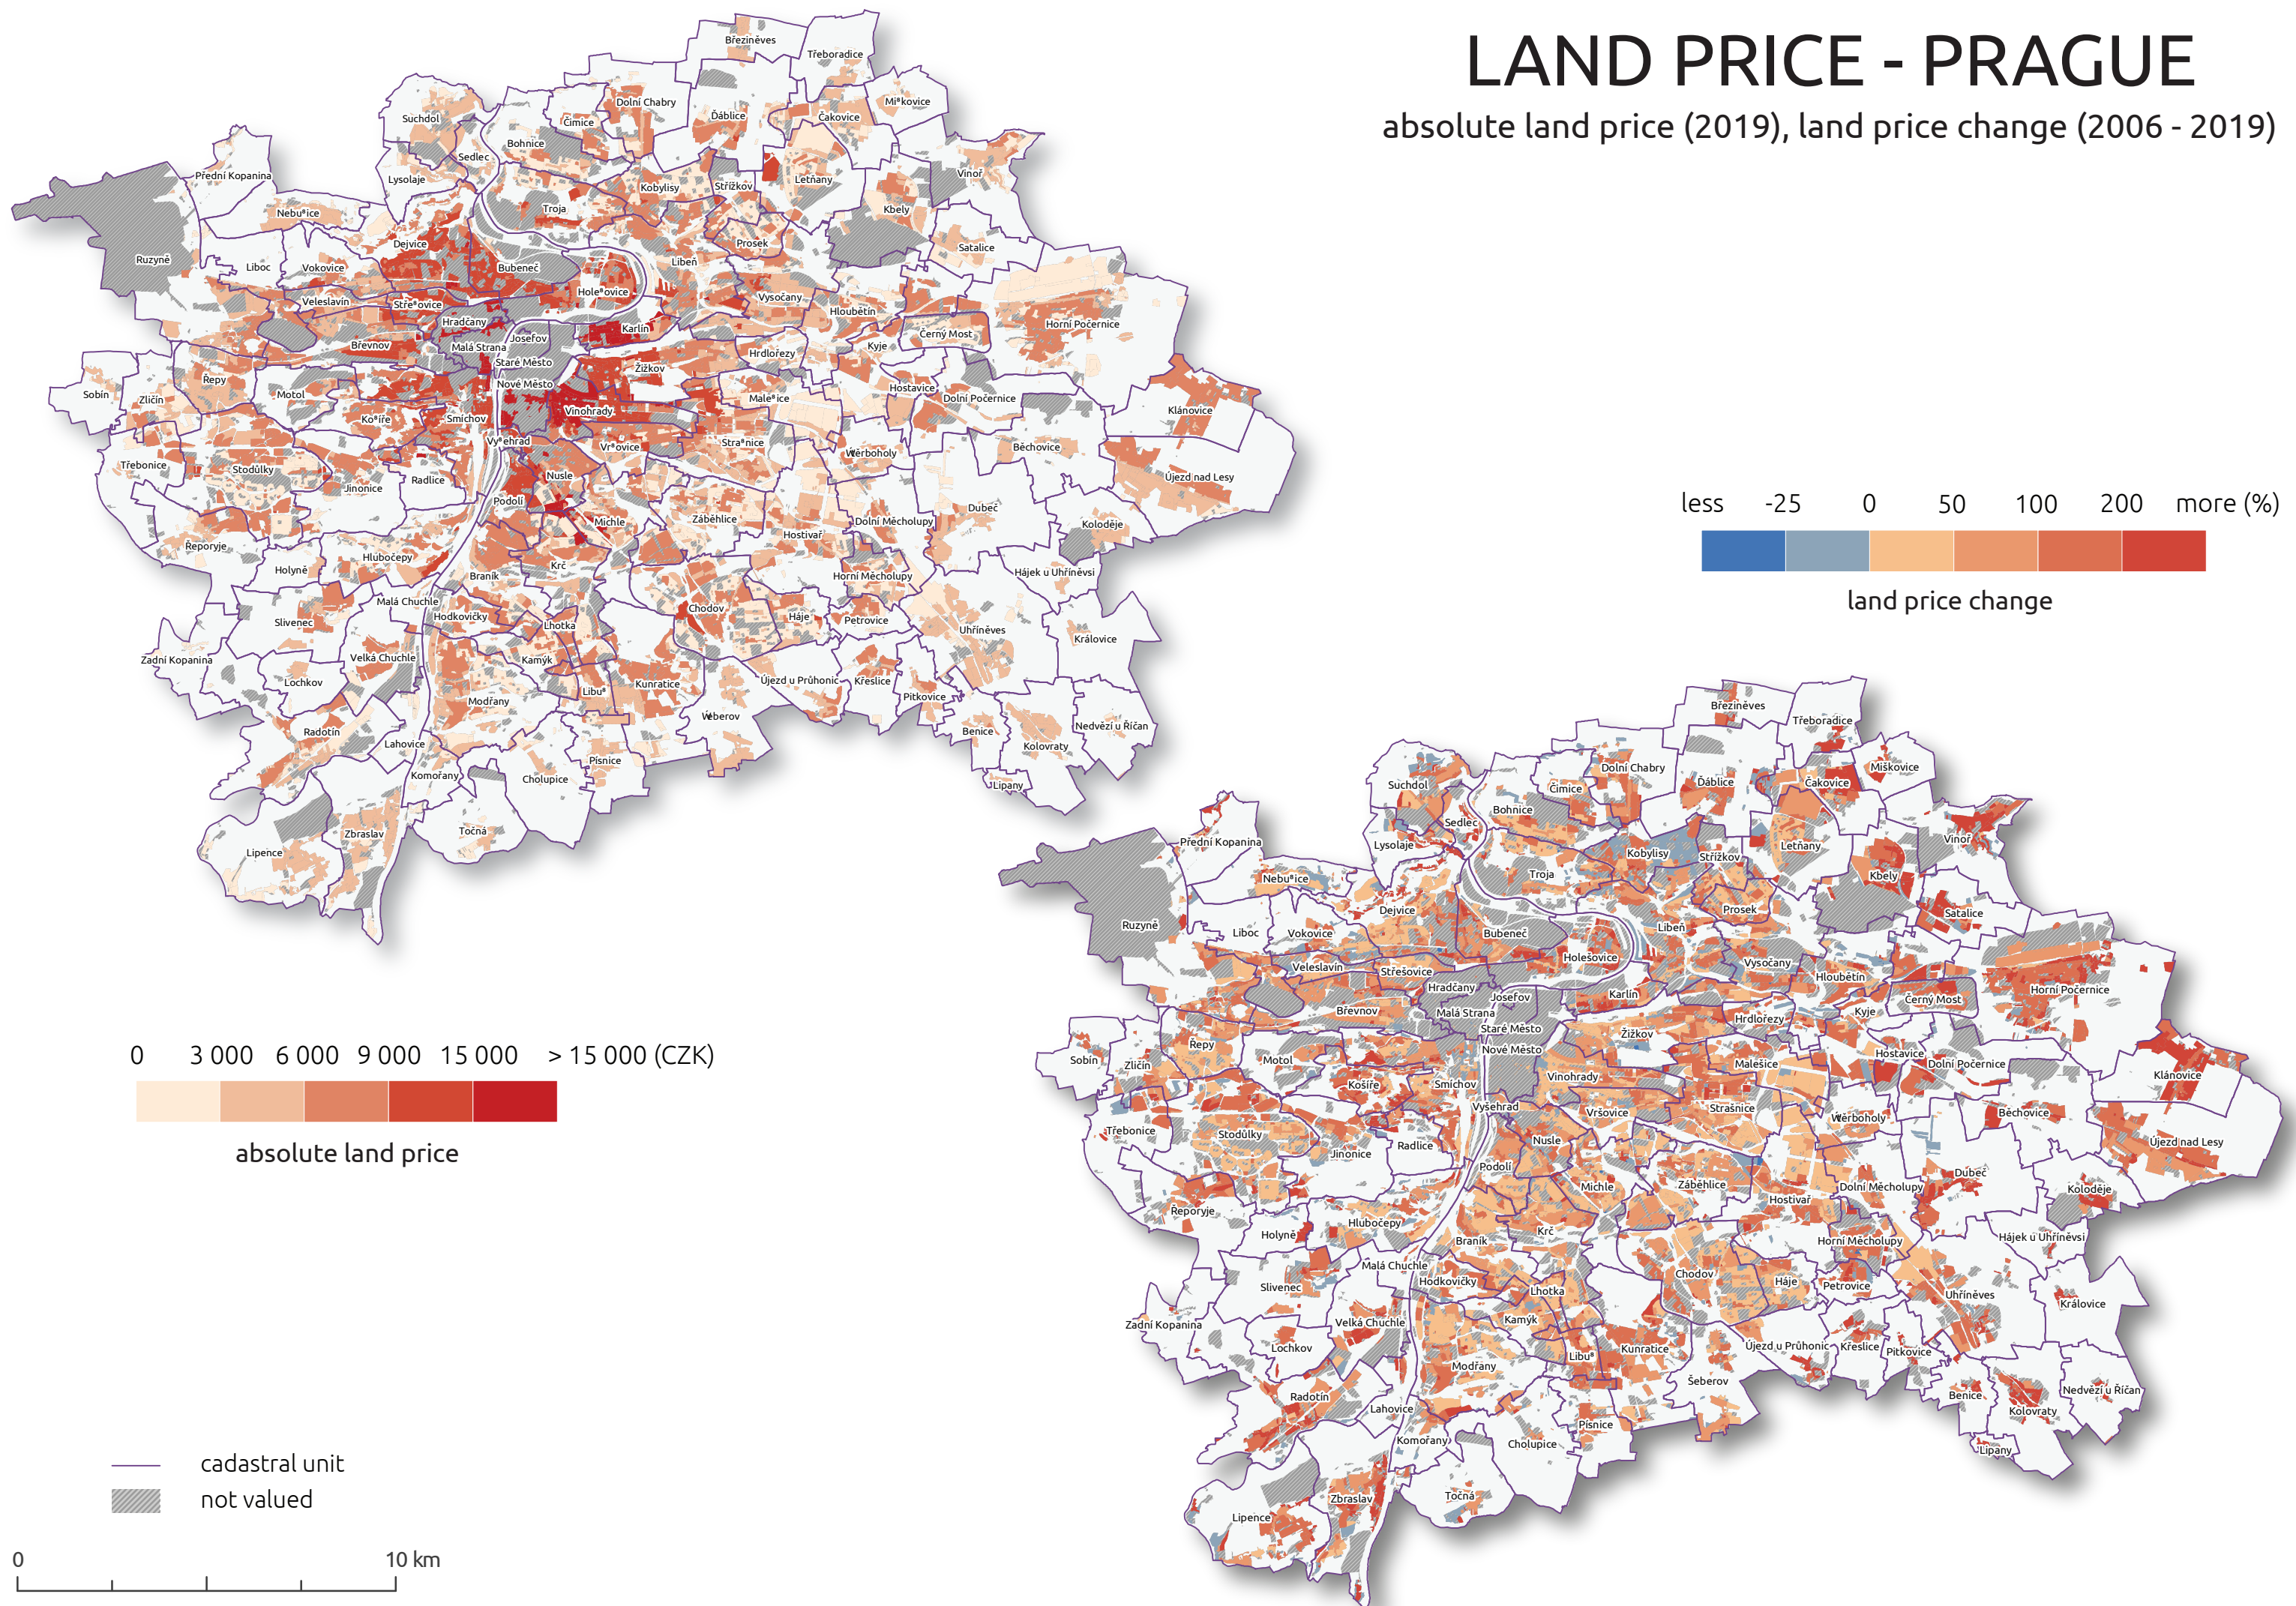

Supplement: s1 [file s1]

# LAND PRICE - OLOMOUC

absolute land price (2019), land price change (2006 - 2019)

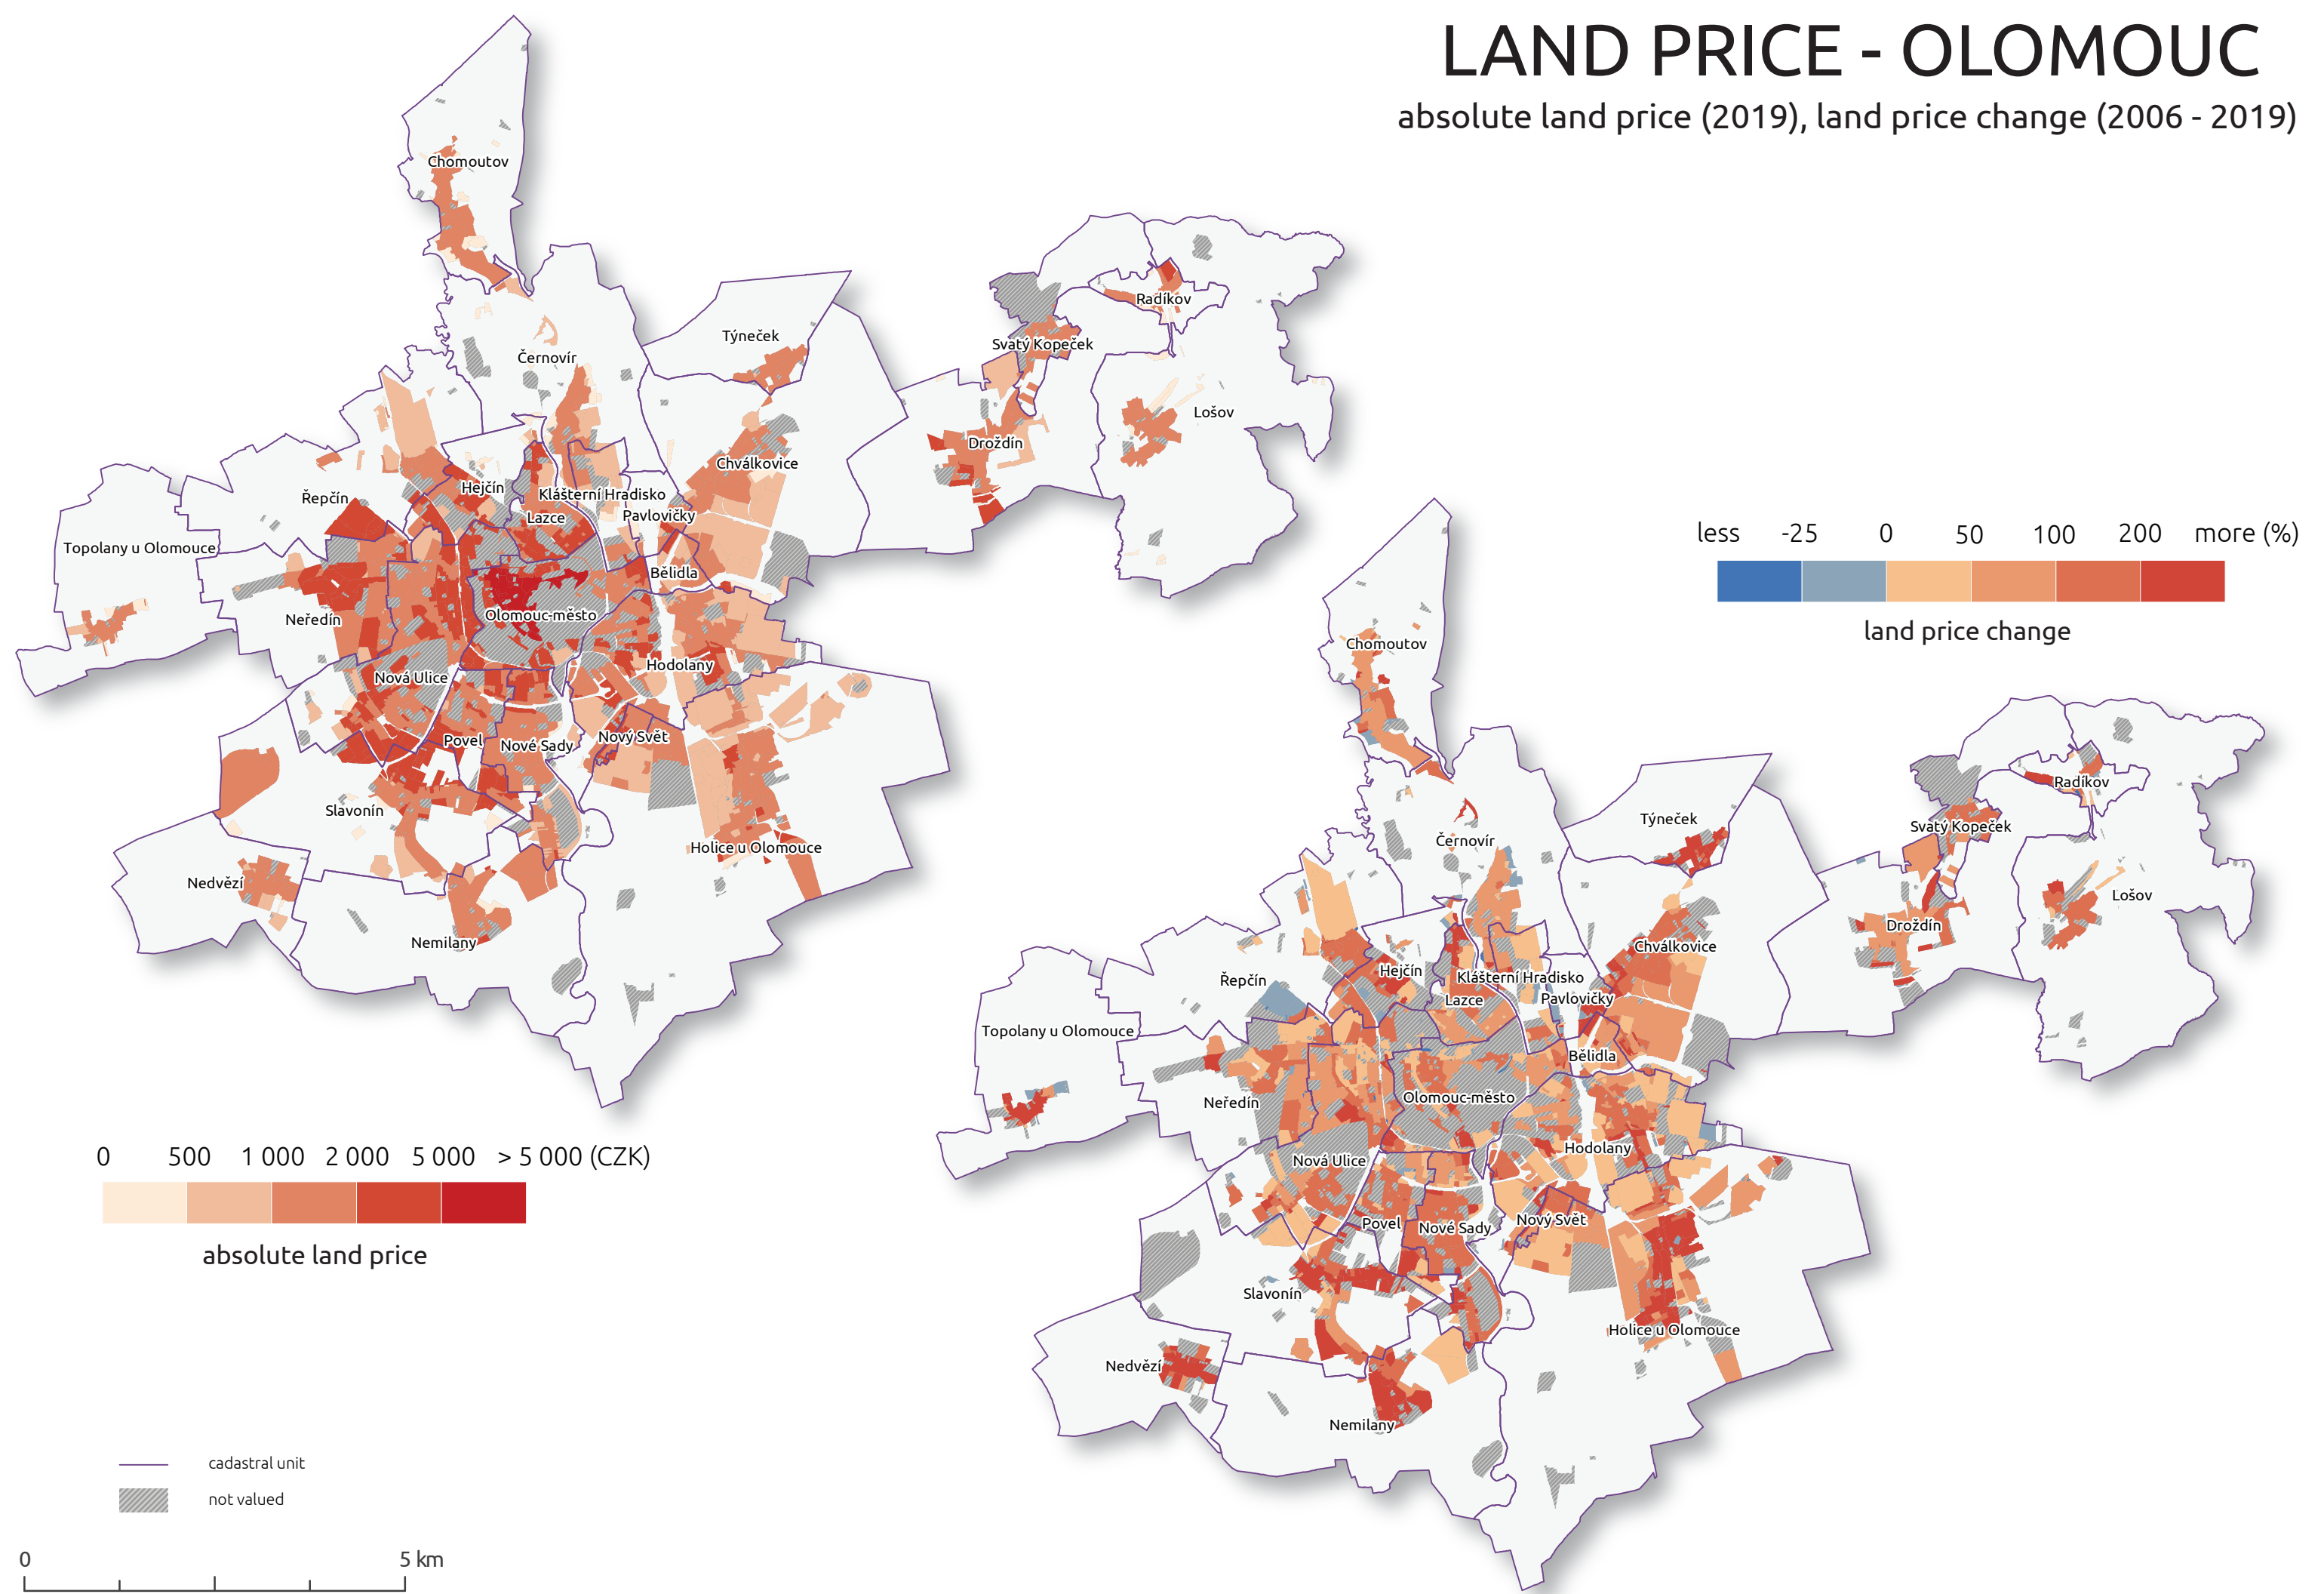

Supplement: s1 [file s1]
